# Supplementary material
Source: publisher figshare collection journal article supplement (https://karger.figshare.com/articles/dataset/_/5123494)
Supplement: Supplementary file 1 [file 1]

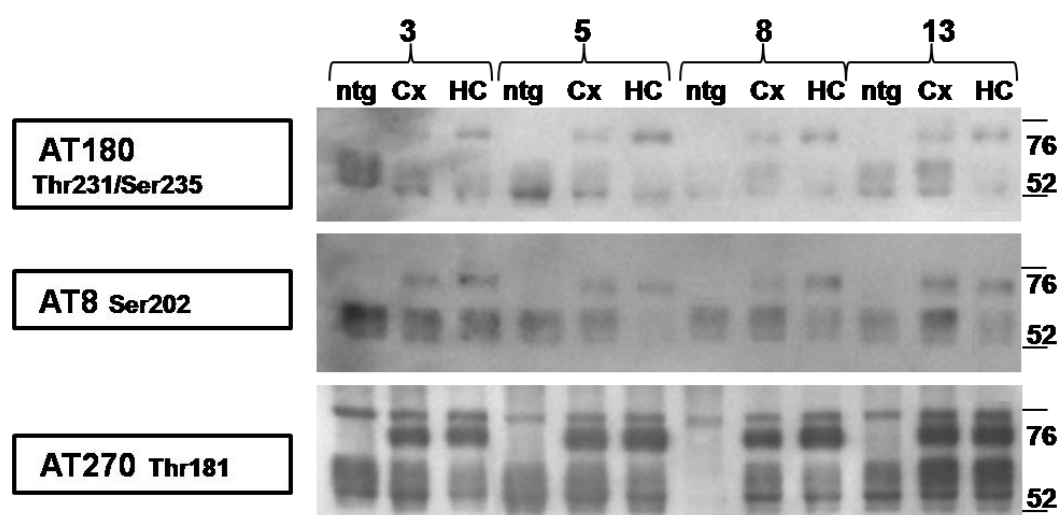

**Figure S2**

**Western blot analysis of ptau Thr231/Ser235, ptau Ser202 and ptau Thr181.** For ptau Thr231/Ser235 blotting antibody AT180 was used. For ptau Ser202 blotting antibody AT8 was used. For ptau Thr181 blotting antibody AT270 was used. For all three blots the same samples were used. Shown are representative blots from all analyzed samples. Phosphorylated TMHT construct bands are marked by arrows.
