# Supplementary material
Source: publisher figshare collection journal article supplement (https://karger.figshare.com/articles/dataset/_/5123494)
Supplement: Supplementary file 2 [file 1]

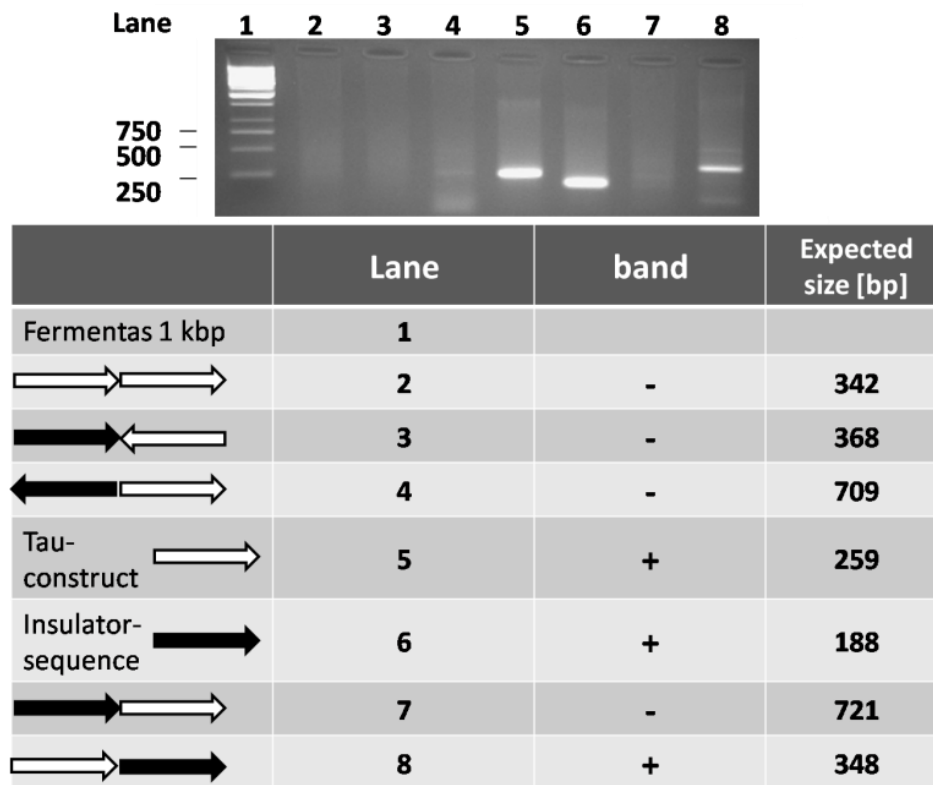

**Figure S1**

**Head-to-Tail PCR of the insulator sequence and the TMHT construct.** PCR product was separated on a 1.5% agarose gel. Analysis shows that the insulator sequence as well as the TMHT construct is inserted only once and that the TMHT construct follows the insulator sequence.
