# Supplementary material
Source: publisher figshare collection journal article supplement (https://karger.figshare.com/articles/dataset/_/5123494)
Supplement: Supplementary file 3 [file 1]

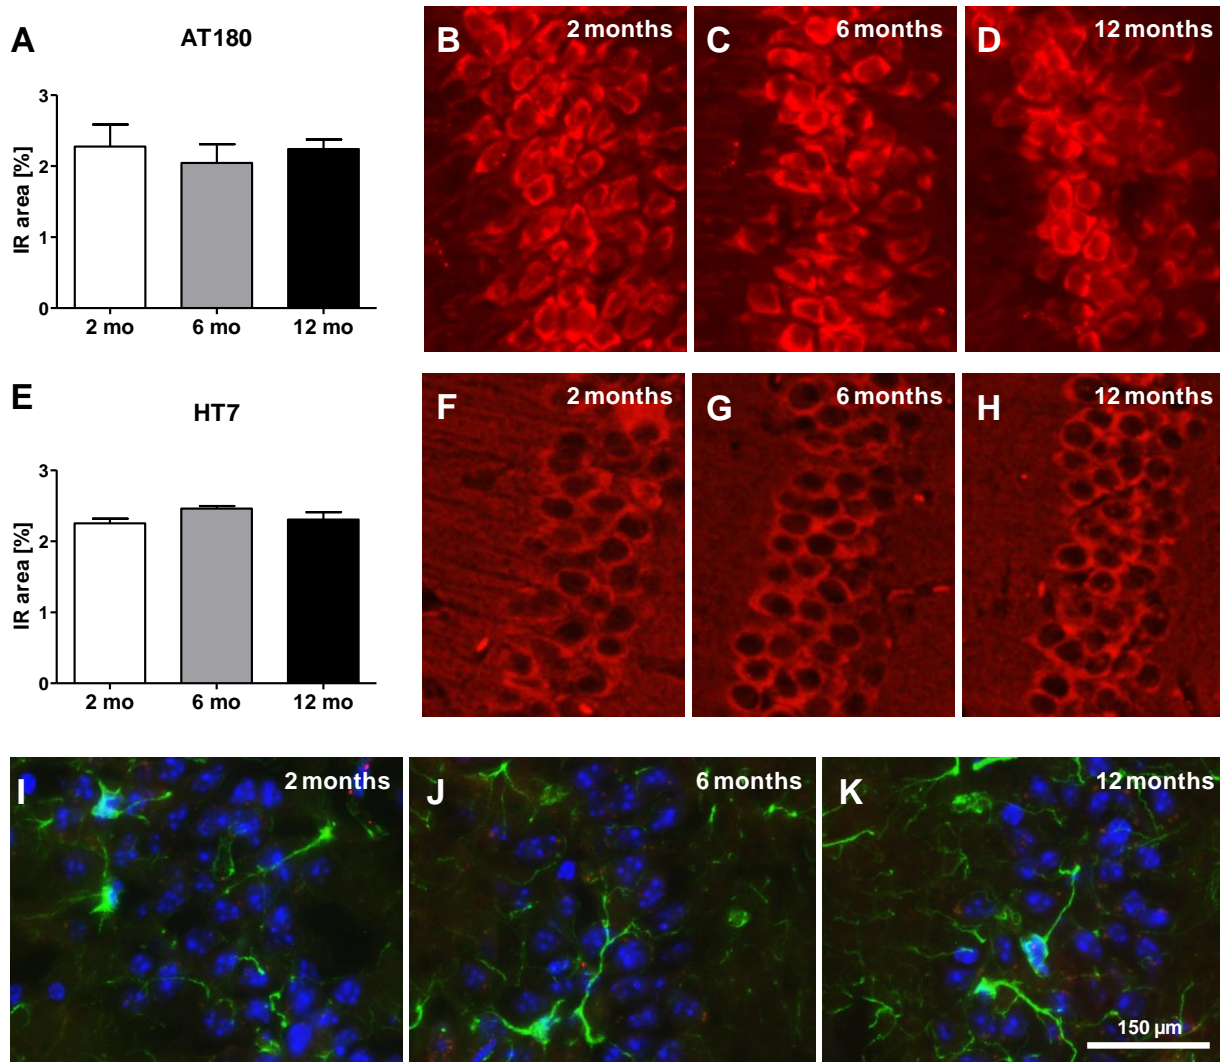

**Figure S3**

**Quantitative analyses of ptau and human tau show stable high-level expression over age in the hippocampus of TMHT mice.** **A:** Quantification of ptau levels in the hippocampus of TMHT mice analyzed with AT180 antibody. **B-D:** Immunofluorescent labeling of ptau (AT180) in the hippocampal CA1 shows persistently high ptau levels in TMHT mice. **E:** Stable human tau levels in the hippocampus of TMHT mice analyzed with HT7 antibody. **F-H:** Immunofluorescent detection of human tau (HT7) in the CA1 region shows persistently high expression in TMHT mice. **I-K:** Double immunofluorescent labeling of activated microglia (CD11b, red) and astrocytes (GFAP, green) provides no evidence for age-dependent changes in the number of glia in the CA1; nuclei are labeled with DAPI (blue). Bar graphs show mean  $\pm$  SEM; n=5 animals per group; one-way ANOVA with Newman-Keuls *post-hoc* tests.
